# Supplementary material
Source: PubMed Central journal article supplement (PMC2268564)

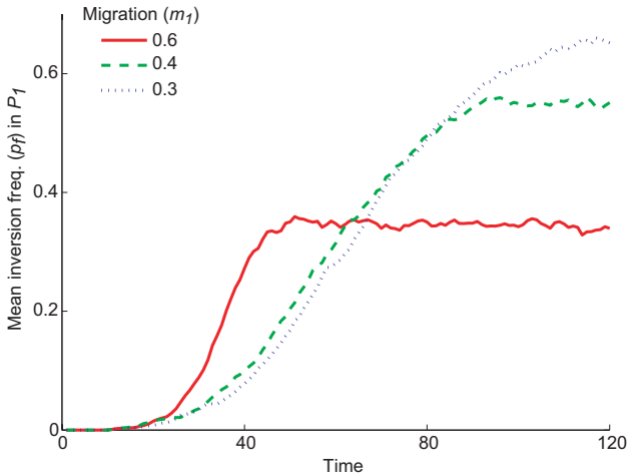

Supplement: pnas_0709806105_1.pdf [file pnas_0709806105_1.pdf]
